# Supplementary material for: Moral Taxation, Immoral Avoidance - What Role for the Law?
Source: Oxford University Press journal article supplement (doi:10.1158/1078-0432.ccr-18-1201), 2013-01-01
Supplement: 10780432ccr181201-sup-200402_2_supp_4768306_p8xrk2.docx [file 10780432ccr181201-sup-200402_2_supp_4768306_p8xrk2.docx]

**Supplement**

**Table of Contents**

**Page**

**Supplemental Table 1.** Patient demographics 2

**Supplemental Table 2.** Characteristics of patients with clonal hematopoiesis (CH) mutations,

excluding *TP53* 2

**Supplemental Table 3.** Description of suspected germline variants identifiedon

FoundationMedicine® testing in the UNC cohort 3

**Supplemental Figure 1**. Violin plots displaying variant allele frequencies (VAF) from

FoundationMedicine® next-generation sequencing testing in nine genes

recurrently mutated in CH, depicting Variants of known significance

only4

**Supplemental Figure** 2 Integrative Genomics Viewer image of mutations reported for a carcinoma

not otherwise specified patient with CH 5

**Supplemental Figure 3**. Integrative Genomics Viewer image of mutations reported for an ovarian

carcinoma patient with CH 6

**Supplemental Figure 4**. Boxplot comparing the COSMIC counts for CH events compared to

tumor somatic events in CH genes 7

**Supplemental Table 1. Patient demographics.** UNC and MCC patients did not differ with respect to age or gender, though there was a significant difference in the proportion of tumor types among each site. aPresence of at least one mutation in a clonal hematopoiesis (CH) gene (*DNMT3A*, *TET2*, *ASXL1*, *TP53*, *ATM*, *CHEK2*, *CBL*, *JAK2*, and *SF3B1*) on clinical FoundationMedicine® reports.

| **Characteristic** | **UNC** | **MCC** | **Total** | **P-value** |
| --- | --- | --- | --- | --- |
| **Number** | 754 | 989 | 1743 | NA |
| **Age (Mean)** | 57.7 | 59.1 | 58.5 | 0.44 |
| **Gender (%Male)** | 46% | 49% | 48% | 0.21 |
| **Any CH mutationa** | 67% | 63% | 65% | 0.09 |
| **Any CH mutation, excluding *TP53*** | 33% | 34% | 34% | 0.54 |
| **Tumor type** |  |  |  | <0.001 |
| Breast | 3% | 11% | 8% |  |
| Gastrointestinal | 13% | 9% | 11% |  |
| Genitourinary | 13% | 4% | 8% |  |
| Gynecologic | 15% | 1% | 7% |  |
| Lung | 27% | 19% | 22% |  |
| Sarcoma | 5% | 14% | 10% |  |
| Skin | 7% | 14% | 11% |  |
| Other | 17% | 28% | 23% |  |

**Supplemental Table 2. Characteristics of patients with clonal hematopoiesis (CH) mutations, excluding *TP53* (which is commonly mutated across solid tumors), versus those without CH mutations reported on FM testing.** Genes include *DNMT3A*, *TET2*, *ASXL1*, *ATM*, *CHEK2*, *CBL*, *JAK2*, and *SF3B1*. Both UNC and MCC patients are included together. The total number of reports is included here because this number represents total number of FoundationMedicine® reports (14 patients had more than one report from different biopsies taken on different days).

| **Characteristic** | **CH**  **(except *TP53*)** | **No CH** | **Total** | **P-value** |
| --- | --- | --- | --- | --- |
| **Number** | 593 | 1164 | 1757 | NA |
| **Age (Mean)** | 61.0 | 57.1 | 58.4 | <0.001 |
| **Gender (%Male)** | 299 (50%) | 547 (47%) | 846 (48%) | 0.17 |
| **Tumor type** |  |  |  | <0.001 |
| Breast | 42 (7%) | 92 (8%) | 134 (8%) |  |
| Gastrointestinal | 60 (10%) | 130 (11%) | 190 (11%) |  |
| Genitourinary | 49 (8%) | 93 (8%) | 142 (8%) |  |
| Gynecologic | 35 (6%) | 90 (8%) | 125 (7%) |  |
| Lung | 154 (26%) | 241 (21%) | 395 (22%) |  |
| Sarcoma | 42 (7%) | 140 (12%) | 182 (10%) |  |
| Skin | 95 (16%) | 89 (8%) | 182 (10%) |  |
| Other | 116 (20%) | 289 (25%) | 405 (23%) |  |

**Supplemental Table 3. Description of suspected germline variants identified on Foundation Medicine® (FM) testing in the UNC cohort.** For testing interval, negative numbers mean that FM testing preceded UNCseqTM testing and positive numbers mean that FM testing occurred after UNCseqTM testing. Age is at time of FM testing. H&N= Head and neck. SCC= Squamous cell carcinoma. aReported as a variant of unknown significance (VUS). LP= likely pathogenic. KP= known pathogenic. B/LB= benign/likely benign.

| **Patient** | **Age** | **Sex** | **Primary Tumor** | **Testing Interval (Days)** | **Gene** | **Variant** | **FM**  **VAF** | **UNCseq**  **Tumor VAF** | **UNCseq**  **Blood VAF** | **Germline interpretation** |
| --- | --- | --- | --- | --- | --- | --- | --- | --- | --- | --- |
| UNC01 | 65 | F | Ovarian | 30 | BRCA2 | R2520* | 73 | 68 | 46 | KP |
| UNC03 | 64 | F | Ovarian | 721 | BRCA2 | T2471fs*8 | 12.7 | 78 | 50 | LP |
| UNC07 | 46 | F | Breast | -656 | BRCA2 | Q2859fs*4 | 62 | 63 | 51 | LP |
| UNC12 | 11 | F | Melanoma | -97 | VHL | P81S | 50 | 44 | 47 | VUS |
| UNC13 | 80 | F | Bladder | 515 | SF3B1a | R238H | 46.1 | 53 | 52 | VUS |
| UNC14 | 66 | F | Salivary gland | -35 | FLT4 | G71R | 50.5 | 46 | 48 | B/LB |
| UNC15 | 55 | M | H&Na SCCb | -511 | TP53a | E68K | 32 | 70 | 30 | VUS |
| UNC16 | 51 | M | Glioblastoma | 8 | FLT3 | Q987* | 48 | 43 | 44 | LP |
| UNC17 | 40 | F | Glioblastoma | -65 | ATMa | Y1442H | 49 | 50 | 51 | VUS |
| UNC18 | 27 | F | Astrocytoma | -23 | ATMa | S333F | 50 | 41 | 53 | B/LB |
| UNC18 | 27 | F | Astrocytoma | -23 | CHEK2a | R523C | 61 | 56 | 49 | VUS |
| UNC19 | 57 | F | Ovarian | 6 | BRCA1 | E23fs*23 | 71 | 90 | 47 | KP |
| UNC19 | 57 | F | Ovarian | 6 | CBLa | A757T | 62 | 69 | 48 | B/LB |
| UNC20 | 63 | F | Vulvar SCC | 335 | KDR | V567M | 62.8 | 50 | 48 | VUS |
| UNC21 | 74 | F | Ovarian | 17 | ASXL1a | A1312V | 52 | 51 | 46 | B/LB |
| UNC22 | 65 | F | Meningioma | -1214 | JAK2a | T555S | 54 | 53 | 40 | VUS |
| UNC23 | 69 | F | Ovarian | 668 | ATMa | P424H | 46.2 | 35 | 51 | VUS |

**Supplemental Figure 1. Violin plots displaying variant allele frequencies (VAF) from FoundationMedicine® next-generation sequencing testing in nine genes recurrently mutated in clonal hematopoiesis, depicting Variants of known significance (VKS) only.** Boxes represent the 25th and 75th percentiles, with the horizontal line in the middle indicating the median, and the vertical lines representing the 95th percentile.

**

**

**Supplemental Figure 2. Integrative Genomics Viewer image of mutations reported for a carcinoma (not otherwise specified) patient with clonal hematopoiesis.** This patient had a *TET2* mutation (left) in tumor tissue and a *DNMT3A* mutation (right) in the blood, both of which were reported on FoundationMedicine® next-generation sequencing testing of the carcinoma biopsy. The *DNMT3A* mutation is seen at a significantly lower level in the tumor sample when compared to blood, thus suggesting CH rather than a tumor somatic event.


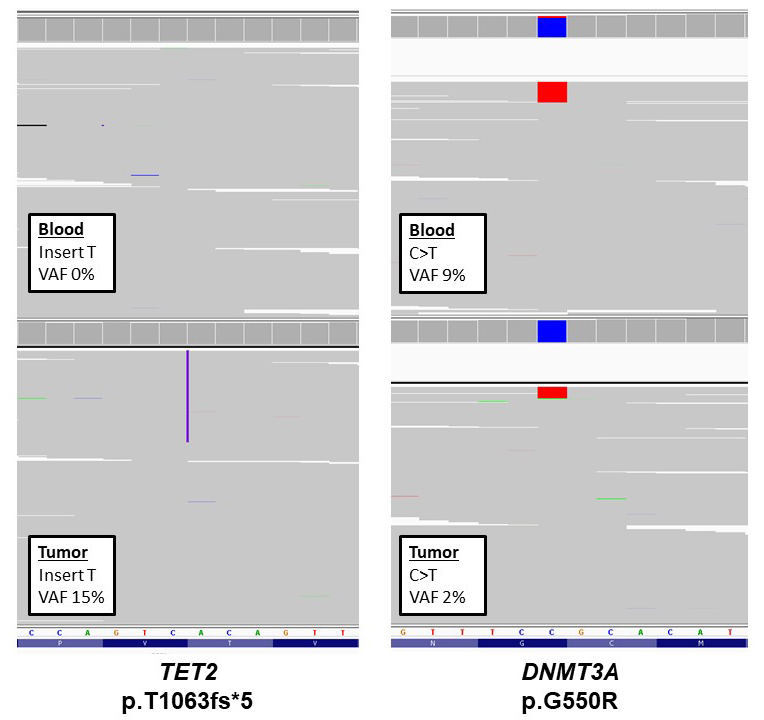


**Supplemental Figure 3. Integrative Genomics Viewer image of mutations reported for an ovarian cancer patient with clonal hematopoiesis.** This patient had a *DNMT3A* mutation (left), a *BRCA2* mutation (middle), and a *TP53* mutation (right) reported on FoundationMedicine® next-generation sequencing testing of the carcinoma biopsy. The *DNMT3A* mutation is seen at a significantly lower level in the tumor sample when compared to blood, suggesting CH rather than a tumor somatic event. The *BRCA2* mutation was seen at a high level in both tumor biopsy and blood sample, consistent with a germline mutation. The *TP53* mutation was seen in the tumor biopsy but absent in the blood, consistent with a tumor somatic event.

**Supplemental Figure 4. Boxplot comparing Catalogue of Somatic Mutations in Cancer (COSMIC) counts for clonal hematopoiesis (CH) mutations and tumor somatic (TS) mutations occurring in CH genes.** CH genes of interest (determined to be TS events) for this analysis include (*DNMT3A*, *TET2*, *ASXL1*, *ATM*, *CHEK2*, *SF3B1*, *CBL*, *JAK2*). COSMIC counts were determined using the number of times the amino acid variants were reported in the COSMIC database in the “haematopoietic and lymphoid” category, COSMIC v85 (released May 8, 2018), with p<0.0001 by Wilcoxon Rank-sum test.
